# Supplementary material for: A framework for evaluating the costs of malaria elimination interventions: an application to reactive case detection in Southern Province of Zambia, 2014
Source: Malar J. 2016 Aug 11;15:408. doi: 10.1186/s12936-016-1457-5 (PMC4982323; doi:10.1186/s12936-016-1457-5)
Supplement: Supplementary file 1 — 10.1186/s12936-016-1457-5 Costing analysis workbook. [file 12936_2016_1457_MOESM1_ESM.xlsx]

## Sheet: Introduction
	The costing analysis begins with the sheet labelled Zambia inflation.
	The sheets labelled "Table 1 2 and 4" and "Table 3" are the tables provides in the manuscript.

## Sheet: Table 1 2 and 4
Table 1. General information
Study location	Southern Province, Zambia
Number of districts included in analysis	10
Number of HFCAs included in final analysis	165
Geographic unit of analysis	Health facility catchment area
Time horizon for analysis	2014 calendar year
Perspective for costing analysis	Provider (Government and MACEPA)
Costing approach	bottom up (ingredients, expenditures, activities), incremental costs
Main currency for analysis	Zambian Kwacha (ZMW)
Other currency included in analysis	US Dollar
2014 annual average exchange rate (2014 ZMW/$)	6.39
Inflation (Zambia and US)	CPI, annual average
Real discount rate	0.03
Year for reporting costs	2014
Table 2. Basic unit costs
	Unit	USD 2014
Provincial medical officer	per day	108.572
NMCC program officer	per day	83.2783
District medical officer (DMO)	per day	79.4843
District health office (DHO) staff, Malaria Focal Person	per day	53.4954
Health facility supervisors (Environmental Health Tech)	per day	40.7223
Community health workers*	per day	11.0269
Driver (DHO)	per day	32.5019
MACEPA driver	per day	48.9294
MACEPA technical staff	per day	175.916
Standard program vehicle (owned by MACEPA or government)	per day	79.4341
Table 4. Final unit costs
Activity	Unit	USD 2014
Training of trainers (per HFCA per year)	per HFCA per year	38.94
Training of CHWs (per CHW per year)	per CHW per year	185.234
Data review (per HFCA per year)	per HFCA per year	813.422
RCD service delivery
CHW pay (per day)	per day	11.0269
dCHW pay (per day)	per day	11.0269
EHT pay (per day)	per day	40.7223
RDT (1 person tested)	1 patient tested	0.356768
Gloves (1 person tested)	1 patient tested	0.0591484
Sharps container (1 person tested)	1 patient tested	0.118297
ACT (1 person treated)	1 patient treated	1.34467
Others CHW supplies (per CHW per year)	per CHW per year	63.7188
Additional supplies (per dCHW per year)	per data CHW per year	1.09847
Airtime (per CHW per year)	per CHW per year	33.7991
airtime (per dCHW per year)	per data CHW per year	46.851
Airtime (per EHT per year)	per EHT per year	11.7128
Bicycle (per CHW or dCHW per year)	per CHW or dCHW per year	29.5253
Cell phone (per dCHW per month)	per dCHW per year	31.8447

## Sheet: Table 3
Table 3. Unit cost for CHW training
Input category	Resource	Unit	Total Units	Unit price	Total cost (2013 ZMW)
DSA, non MACEPA	DSA CHWs	Day	90	300	27000
	DSA HF supervisors	Day	9	500	4500
	DSA Trainers (DMO staff)	Day	12	500	6000
	NMCC parasitologist	Day	4	600	2400
	NMCC driver	Day	4	350	1400
DSA for MACEPA	Accomodation	Day	15	300	4500
	M&IE	Day	20	210	4200
Other allowances	Lunch allowance	Day	12	50	600
Transport	Transport allowance	Day	12	100	1200
	CHW/other transport allowance	Day	66	50	3300
	Bus hire for field work	Bus trip	2	1150	2300
	MACEPA vehicle	Vehicle days	4	507.64	2030.56
	Fuel for MACEPA vehicle	Total fuel			200
	GRZ vehicle	Vehicle days	4	507.64	2030.56
	Fuel for NMCC vehicle	Total fuel			200
Venue costs	Venue	Day	2	300	600
Refreshments	Mineral water	Portion	100	3	300
	Snacks	Portion	100	15	1500
Other costs	Bostik	Total			8
	Printing and copying	Total			300
	Airtime	Total			100
	Sim cards and airtime	Total			160
	Renting storage space	Day	4	120	480
Sationary and printing	Stationnary	Total			1527
	Printed materials	Total	36	28	704
Staff salaries	Environmental Health Officer	Day	12	260.244	3122.92
	Midwife nurse	Day	12	260.244	3122.92
	DMO pharmacist	Day	3	507.96	1523.88
	MFPP/EHT	Day	3	260.244	780.731
	District trainers	Day	12	341.873	4102.48
	NMCC Parasitologist	Day	4	507.96	2031.84
	NMCC Driver	Day	4	207.71	830.84
	MACEPA Technical	Day	8	1124.23	8993.8
	MACEPA Support	Day	4	312.693	1250.77
	MACEPA PADM	Day	4	312.693	1250.77
	MACEPA Driver	Day	4	312.693	1250.77
Total (2013 ZMW)					95801.9
Total (2014 ZMW)	(8% inflation 2013 to 2014)				103466
Total (2014 USD)					16190.1
Number of CHWs trained					30
Cost per CHW					539.669
Annualized cost per CHW (2014 USD)					185.233	3 years, 3%

## Sheet: Zambia inflation
Country	Variable	Units		Country/Series-specific Notes	2005	2006	2007	2008	2009	2010	2011	2012	2013	2014*
Zambia	Inflation, average consumer prices	Index		Source: National Statistical Office Latest actual data: 2013 Harmonized prices: No Frequency of source data: Monthly Base year: 1994 Primary domestic currency: Zambian kwacha Data last updated: 08/2014	63.488	69.213	76.587	86.122	97.655	105.956	115.13	122.7	131.263	141.764
					2005	2006	2007	2008	2009	2010	2011	2012	2013	2014*	*IMF staff estimate
Inflation index numbers to inflate to 2014 ZMW				Index numbers to inflate to 2014 (costing year), based on CPI	2.23293	2.04823	1.85102	1.64608	1.45168	1.33795	1.23134	1.15537	1.08	1
				Index numbers based on GDP deflator						1.31602	1.17971	1.13175	1.07067	1
				GDP deflator Zambia
				Country						2010	2011	2012	2013	2014
				Zambia						100	111.555	116.282	122.915	131.602
				See notes for: Gross domestic product, constant prices (National currency) Gross domestic product, current prices (National currency).

## Sheet: US inflation
US inflation
Country	Subject Descriptor	Units	Scale	Country/Series-specific Notes	2005	2006	2007	2008	2009	2010	2011	2012	2013	2014*
US	Inflation, average consumer prices	Index		Source: National Statistical Office Latest actual data: 2013 Harmonized prices: No Frequency of source data: Monthly Base year: Base is 1982-1984 = 100 Primary domestic currency: U.S. dollars Data last updated: 03/2014	195.267	201.558	207.344	215.254	214.565	218.08	224.932	229.599	232.96	237.563	*IMF staff estimate
Inflation index numbers to inflate to 2014 USD				Index number to inflate to 2014	1.21661	1.17863	1.14574	1.10364	1.10718	1.08934	1.05615	1.03469	1.01976	1
International Monetary Fund, World Economic Outlook Database, October 2014
http://www.imf.org/external/pubs/ft/weo/2014/02/weodata/index.aspx
Accessed on 19 February 2015

## Sheet: Exchange rates
Exchange rates
Exchange rates are needed for each year costs are incurred (and the original purchase in not in Zambian Kwacha).
The ZMK/$ rate for 2014 is also needed for reporting purposes.
Source:	Oanda.com, Historical exchange rate for January 1 to December 31, 2014
	www.oanda.com/currency/historical-rates/
	Accessed on 2 February 2015
Exchange rate - ZMW/USD
Period Average	6.3907
Period High	7.004
Period Low	5.4916
Notes: Details of which exchange rate used.
Historical Exchange Rates
Daily MIDPOINT rates @ +/- 0%
DATE: Jan 1, 2014 to Dec 31, 2014
INTERBANK: +/- 0%
PRICE: Midpoint
VALUES: Rate
FREQUENCY: Daily
Exchange rate - ZMK/ZMW
Zambia's currency was rebased on January 1, 2013, from ZMK to ZMW). Purchases made in ZMK prior to January 1, 2013 are converted to ZMW.
	ZMK/ZMW
	1000
Note: Exchange rates for other years and currencies are needed when relevant for the analysis.

## Sheet: Discount rate
Discount rate
Source:
Scenario	Annual discount rate	Source	Notes
Base case	0.03	Weinstein et al., JAMA 1996	We are using a 3% discount rate in accordance with standard practice in the literature
Sensitivity analysis - lower end possible	0	Assumption
Sensitivity analysis - upper end	0.1075	See calculation below using 10-year Government of Zambia bond rates (Yield for 10-year bond (from www.boz.zm) in 2014, minus annual inflation)
Source for real discount rate calcuation
http://www.boz.zm/
Result of the GRZ Bond Tender No : 02/2014/BA held on : 23/05/2014 is as follows:
Period	Yield Rate
2 Years	15.5
3 Years	16.25
5 Years	17.5
7 Years	18.25
10 Years	18.75	Nominal costs of funds to government
15 Years	18.9
10 year bond sold 2014
Yield	18.75
Inflation 2014	7.99997	From Zambia inflation Sheet
Real DISCOUNT RATE	10.75	Real cost of funds to government

## Sheet: GRZ salary scale
Government of Zambia salary scales
The purpose of this sheet is to develop basic unit costs for government staff who participate in MACEPA activities. While the Government of Zambia has official salaries and benefits for each category and grade of employee, the informations seems to be considered "confidential" by the government. We have requested this information from various government sources, but to date we have been unsuccess…
Note: This analysis only requires salary information for the category of government staff participating in MACEPA activities. These will often include staff at the Provincial Health Office, staff at the District Health Office (e.g. Malaria Focal Point, Pharmacist), and staff at health facilities (Environmental Health Tech, Nurse in Charge).
How many days do health workers actually work?
Working days
Maximum workng days per year	260.714
Annual leave	20	May need to adjust for each pay grade
National holidays	13	May need to adjust for each pay grade
Sick leave or other paid days off	5	May need to adjust for each pay grade
Actual working day per year	222.714
Working days per month	18.5595	This is the current base assumption unless new salary and benefits data are obtained
Government of Zambia civil service salary scale
Source:		Estimates based on general information
Scale	Notch	Salary per month	Housing allowance	Other allowances	Gross pay per month	Gross pay per day (2014 ZMW)
MS01	1	8000	435	150	8585	693.849
MS02	1	7000	435	150	7585	613.028
MS03	1	6000	435	150	6585	532.207
MS04	1	5700	435	150	6285	507.96
MS05	1	3700	380	150	4230	341.873
MS06	1	3400	340	150	3890	314.394
MS07	1	2800	270	150	3220	260.244
MS08	1	2250	270	150	2670	215.792
MS09	1	2150	270	150	2570	207.71
MS10	1	2000	220	150	2370	191.546
MS11	1	1800	220	150	2170	175.382
Low official minimum wage unskilled labor					1307.88	70.4695
CHAs from CHA costing analysis					2808	151.297
Note: In 2012, the minimum monthly wage for general workers was about ZMW 1,132, when inflated to 2013, we have:	1307.88	http://www.mywage.org/zambia/main/salary/minimum-wage
Note: CHAs are community health assistants, which were intended to be a paid and more trained cadre of workers in Zambia.
				CHA salary CHAI study
			Annual	33696	ZMW 2014
			working days	222.714
			ZMW 2014	150.429

## Sheet: Partner salary scales
PARTNER Salary Scales
This sheet contains information on MACEPA and Akros Partner Salary Scales (2014 in ZMW). PATH information for support and technical staff are provided below and below PATH information is Akros information. For each staff category, we use the mid-point between the minimum and maximum salaries with benefits. For technical staff, when the specific category of staff used during implemention is not re…
Estimate of working days per year and month		Notes
Maximum working days per year	260.714
Annual leave	24
National holidays	13
Compassionate leave	5
Sick leave	5	as per law (estimate used here)
Estimate -- Typical working days per year	218.714
Working days per month	18.2262
Staff Type	Official Title	Grade	Min (monthly), ZMW	Max (monthly), ZMW	MidPoint for Grade	Benefits (30% of Salary)	Full cost to employer (monthly)	Full cost to employer (daily), ZMW 2014
SUPPORT	Driver I Receptionist I, Office assistant I	3020	2805	4384	3507	1052.1	4559.1	250.14
	Admin assist I, Receptionist II, Finance/Accounting Assistant I, Office assistant II, Driver II	3030	3507	5479	4384	1315.2	5699.2	312.693
	Admin assist II, program assist I, Finance/Accounting assistant II	3040	4384	6849	5479	1643.7	7122.7	390.795
	Admin assist III, Program assist II, Finance/accounting asst III	3050	5479	8560	6849	2054.7	8903.7	488.511
	Program assistant III	3060R	6849	10700	8560	2568	11128	610.55
TECHNICAL RESOURCE	Finance/Accounting associate PADM	4010	5826	9831	7283	2184.9	9467.9	519.467
	Finance/ Acocunting officer I PADM II	4020	7283	12289	9103	2730.9	11833.9	649.28
	Finance/Accounting officer II	4030	9103	15361	11378	3413.4	14791.4	811.546
	Sr.Finance/Accounting officer	4040	11378	19200	14223	4266.9	18489.9	1014.47
	Sr PADM officer	4050	14212	24000	17778	5333.4	23111.4	1268.03
TECHNICAL PROGRAM	Program associate	5010	6452	10886	8065	2419.5	10484.5	575.244
	Program officer I	5020	8194	13826	10241	3072.3	13313.3	730.449
	Program officer II	5030	10406	17559	13007	3902.1	16909.1	927.736
	Sr Program officer	5040	13215	22300	26518	7955.4	34473.4	1891.42
	Program advisor	5050	16782	28320	20978	6293.4	27271.4	1496.28
							Average for technical program staff	1124.23
Akros salary information
	# of days
Estimate of working days per year and month	Number of days
Maximum working days per year	260		(52 weeks x 5 days)
Sick leave	26
Vacation days	24
National holidays	14		(15 in 2015)
Compassionate leave	7
Estimate -- Typical working days per year	189
Working days per month	15.75
Figures below include basic and all contractual monthly payments to staff. These figures do not include the contracted bonus, which is paid annually and is equivalent to c.10-11% of monthly payments
Official title	Min (monthly) (ZMW)	Max (monthly) (ZMW)	Mid (monthly) (ZMW)	Full cost to employer (daily), ZMW 2014
Program Manager	14700	18200	16450	1175
Surveillance Officer	10800	13300	12050	860.714
Driver	4000	4800	4400	314.286
			Average of technical	1017.86

## Sheet: Districts in Analysis
District characteristics
	Districts in Costing Analysis
1	so Chikankata District
2	so Choma District
3	so Gwembe District
4	so Kalomo District
5	so Mazabuka District
6	so Monze District
7	so Pemba District
8	so Siavonga District
9	so Sinazongwe District
10	so Zimba District

[truncated: 14 more sheets: HFCA primary data, Unit Costs - Labor, Unit costs - Vehicles, Unit costs - Other Equip, Unit costs - RCD Supplies, UC - training of trainers, UC - Training CHWs, UC - Data review, UC - Final training unit costs, Summary Final Unit Costs, Final Data Set by HFCA, Do File, Summary Results and Table 5, Sheet2]
